# Supplementary material for: Systemic pro-inflammatory response identifies patients with cancer with adverse outcomes from SARS-CoV-2 infection: the OnCovid Inflammatory Score
Source: HighWire-hosted journal article supplement (doi:10.1136/jitc-2020-002277), 2021-03-01
Supplement: jitc-2020-002277supp003_data_supplement.pdf [file jitc-2020-002277supp003_data_supplement.pdf]

**Supplementary Table 3. Training and validation set matching for key characteristics.** *P* values for differences in categorical distributions of known risk factors for severe Covid-19 for training (*n*=529) and validation (*n*=542) sets determined via Pearson's chi-square test.

| <b>Characteristic</b>                                  | <b><math>\chi^2</math>; <i>P</i> value Between Training and Validation Sets</b> |
|--------------------------------------------------------|---------------------------------------------------------------------------------|
| Proportion below 65 versus at or above 65 years of age | 0.697 (1 df); 0.404                                                             |
| Number of comorbidities (0, 1, 2, 3+)                  | 2.006 (3 df); 0.571                                                             |
| Number of Covid-19 complications (0, 1, 2, 3+)         | 0.940 (3 df); 0.816                                                             |
| Proportion with active malignancy versus in remission  | 3.445 (1 df); 0.063                                                             |

Covid-19: Coronavirus disease 2019; df: Degrees of freedom
