# Supplementary material for: Systemic pro-inflammatory response identifies patients with cancer with adverse outcomes from SARS-CoV-2 infection: the OnCovid Inflammatory Score
Source: HighWire-hosted journal article supplement (doi:10.1136/jitc-2020-002277), 2021-03-01
Supplement: jitc-2020-002277supp005_data_supplement.pdf [file jitc-2020-002277supp005_data_supplement.pdf]

**Supplementary Table 5. Inflammatory marker values across cancer types.** Unadjusted mortality, median inflammatory marker values with interquartile ranges, and categorically distributed inflammatory marker values shown for primary tumor site categories of the whole dataset ( $n=1,071$ ).

| Tumor Site                | Unadjusted Mortality | NLR (median, IQR) | PLR (median, IQR) | OIS (median, IQR) | mGPS (0/1/2, %)                 | PI (0/1/2, %)                    |
|---------------------------|----------------------|-------------------|-------------------|-------------------|---------------------------------|----------------------------------|
| Head & Neck               | 38.2%                | 7.1<br>(10.8)     | 390.4<br>(245.0)  | 39.8<br>(9.2)     | 5/6/11<br>(22.7%/27.3%/50.0%)   | 5/21/3<br>(17.2%/72.4%/10.3%)    |
| Lung & Thoracic           | 47.4%                | 7.8<br>(9.4)      | 296.3<br>(249.3)  | 37.8<br>(9.7)     | 21/23/38<br>(25.6%/28.0%/46.3%) | 13/86/26<br>(10.4%/68.8%/20.8%)  |
| Gastroesophageal          | 32.7%                | 8.2<br>(12.5)     | 238.0<br>(415.4)  | 38.4<br>(10.6)    | 8/5/18<br>(25.8%/16.1%/58.1%)   | 7/19/10<br>(19.4%/52.8%/27.8%)   |
| Hepatobiliary             | 47.3%                | 6.4<br>(8.3)      | 212.5<br>(265.6)  | 33.8<br>(10.8)    | 13/5/18<br>(36.1%/13.9%/50.0%)  | 12/25/10<br>(25.5%/53.2%/21.3%)  |
| Duodenal & Lower GI Tract | 38.6%                | 6.3<br>(9.2)      | 309.7<br>(221.3)  | 36.5<br>(10.5)    | 18/16/42<br>(23.7%/21.1%/55.3%) | 16/62/13<br>(17.6%/68.1%/14.3%)  |
| Breast                    | 20.9%                | 4.3<br>(5.9)      | 221.7<br>(202.3)  | 39.8<br>(8.4)     | 36/37/33<br>(34.0%/34.9%/31.1%) | 33/89/14<br>(24.3%/65.4%/10.3%)  |
| Gynecological             | 36.8%                | 4.9<br>(5.9)      | 282.6<br>(273.6)  | 36.7<br>(10.3)    | 5/9/24<br>(13.2%/23.7%/63.2%)   | 5/35/8<br>(10.4%/72.9%/16.7%)    |
| Genitourinary             | 34.3%                | 6.6<br>(10.7)     | 271.9<br>(266.0)  | 38.0<br>(8.7)     | 26/51/78<br>(16.8%/32.9%/50.3%) | 18/123/29<br>(10.6%/72.4%/17.1%) |
| Skin                      | 39.5%                | 6.1<br>(9.0)      | 217.5<br>(276.6)  | 42.5<br>(15.0)    | 3/20/11<br>(8.8%/58.8%/32.4%)   | 1/26/8<br>(2.9%/74.3%/22.9%)     |
| Lymphoma                  | 33.3%                | 4.8<br>(5.8)      | 214.8<br>(335.5)  | 40.0<br>(11.1)    | 22/14/21<br>(38.6%/24.6%/36.8%) | 20/32/8<br>(33.3%/53.3%/13.3%)   |
| Other                     | 26.6%                | 5.6<br>(9.4)      | 255.5<br>(284.9)  | 39.1<br>(10.6)    | 12/10/13<br>(34.3%/28.6%/37.1%) | 12/28/11<br>(23.5%/54.9%/21.6%)  |

NLR: Neutrophil-lymphocyte ratio; PLR: Platelet-lymphocyte ratio; OIS: OnCovid Inflammatory Score; mGPS: Modified Glasgow prognostic score; PI: Prognostic index; IQR: Interquartile range; GI: Gastrointestinal
