# Supplementary material for: Systemic pro-inflammatory response identifies patients with cancer with adverse outcomes from SARS-CoV-2 infection: the OnCovid Inflammatory Score
Source: HighWire-hosted journal article supplement (doi:10.1136/jitc-2020-002277), 2021-03-01

**Supplementary Figure 2. Relationship between inflammatory markers and clinical variables.** Median values for clinical variables are shown for patients in good and poor risk groups for each inflammatory index. \*= $P < 0.05$ ; \*\*= $P < 0.01$ ; \*\*\*= $P < 0.001$ ; \*\*\*\*= $P < 0.0001$ . Error bars represent 95% confidence interval from the median.

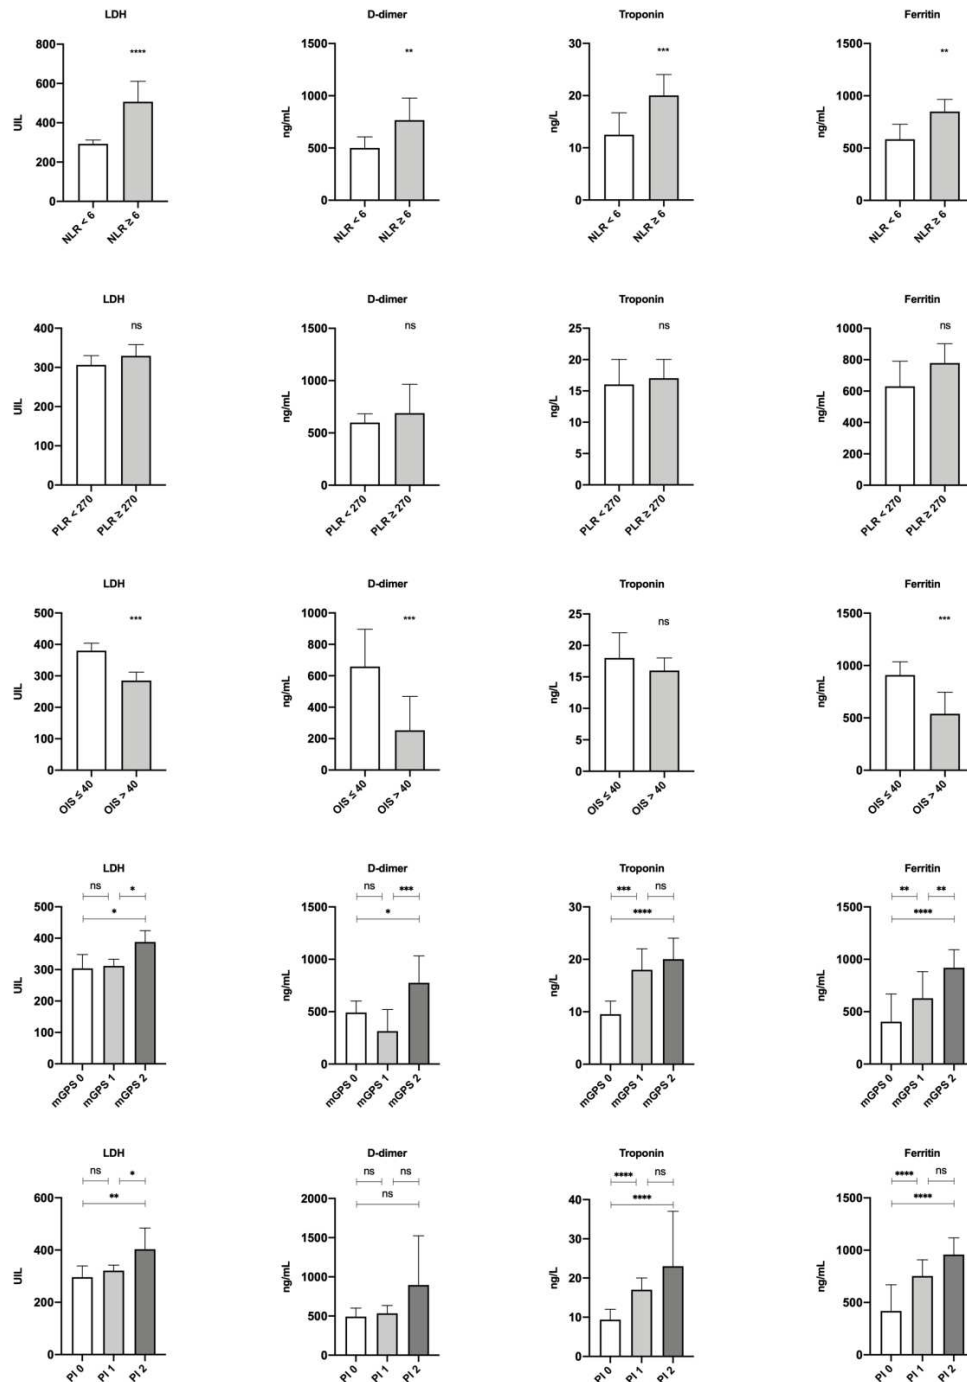

Supplement: jitc-2020-002277supp010_data_supplement.pdf [file jitc-2020-002277supp010_data_supplement.pdf]
